# Supplementary material
Source: MDPI journal article supplement (https://www.mdpi.com/2076-3298/5/6/67)
Supplement: s1 [file s1]

**Table S1.** Categorisation of relevant marine ecosystem services. For each article, the definition of ecosystem services used is shown in the second line, respectively. The ecosystem services are numbered consecutively in the first column. Columns 2 and 3 contain the categorisation of the MES along with the definition. The rest of the columns show the ES classification and definitions of other authors: Böhnke-Henrichs *et al.* [1], Hattam *et al.* [2], Liqueste *et al.* [3], Beaumont *et al.* [4], Atkins-, *et al.* [5]. N/A indicates that the ecosystem service was not defined by the respective author.

| This research                                                      |                     |                                                                                                                                                                                         | Böhnke-Henrichs <i>et al.</i> [1]                                                                          |                                                                                                                                                                                                                                       | Hattam <i>et al.</i> [2]                                                                                  |                                                                                                              | Liqueste <i>et al.</i> [3]                                                   |                                                                                                                                              | Beaumont <i>et al.</i> [4]                                                                       |                                                                                                                                                                                       | Atkins <i>et al.</i> [5]                                                                              |                                                                    |
|--------------------------------------------------------------------|---------------------|-----------------------------------------------------------------------------------------------------------------------------------------------------------------------------------------|------------------------------------------------------------------------------------------------------------|---------------------------------------------------------------------------------------------------------------------------------------------------------------------------------------------------------------------------------------|-----------------------------------------------------------------------------------------------------------|--------------------------------------------------------------------------------------------------------------|------------------------------------------------------------------------------|----------------------------------------------------------------------------------------------------------------------------------------------|--------------------------------------------------------------------------------------------------|---------------------------------------------------------------------------------------------------------------------------------------------------------------------------------------|-------------------------------------------------------------------------------------------------------|--------------------------------------------------------------------|
| Ecosystem services are the benefits people obtain from ecosystems. |                     |                                                                                                                                                                                         | “Ecosystem services are the direct and indirect contributions of ecosystems to human well-being.” (p. 138) |                                                                                                                                                                                                                                       | “Ecosystem services are the direct and indirect contributions of ecosystems to human well-being.” (p. 61) |                                                                                                              | “Ecosystem services are the benefits that people derive from nature.” (p. 1) |                                                                                                                                              | “Ecosystem services are the direct and indirect benefits people obtain from ecosystems.” (p.254) |                                                                                                                                                                                       | “Ecosystem services can be referred to as the sum total of all ecosystem natural processes.” (p. 219) |                                                                    |
| #                                                                  | Name                | Definition                                                                                                                                                                              | Name                                                                                                       | Definition                                                                                                                                                                                                                            | Name                                                                                                      | Definition                                                                                                   | Name                                                                         | Definition                                                                                                                                   | Name                                                                                             | Definition                                                                                                                                                                            | Name                                                                                                  | Definition                                                         |
| 1                                                                  | Food Supply         | The marine flora and fauna extracted from unmanaged environments or aquacultures that are used for human consumption.                                                                   | Sea Food                                                                                                   | All available marine fauna and flora extracted from coastal/ marine environments for the specific purpose of human consumption as food (i.e. excluding for consumption as supplements).                                               | Food Provision: Wild Capture Sea Food                                                                     | All available marine flora and fauna extracted from unmanaged marine environments for consumption by humans. | Food Provision                                                               | The provision of biomass for human consumption and the conditions to grow it. It mostly relates to cropping, animal husbandry and fisheries. | Food Provision                                                                                   | The extraction of marine organisms (i.e. plants and animals) for human consumption.                                                                                                   | Food Provision                                                                                        | The extraction of marine organisms for human consumption.          |
|                                                                    |                     |                                                                                                                                                                                         |                                                                                                            |                                                                                                                                                                                                                                       | Food Provision: Farmed Sea Food                                                                           | Food from aquaculture for consumption by humans.                                                             |                                                                              |                                                                                                                                              |                                                                                                  |                                                                                                                                                                                       |                                                                                                       |                                                                    |
| 2                                                                  | Water Supply        | The marine water (i.e. saline, brackish, and freshwater) that is abstracted from the water column and aquifers for human consumption and for use in industrial and economic activities. | Sea Water                                                                                                  | Marine water in oceans, seas and inland seas that is extracted for use in human industry and economic activity.                                                                                                                       | N/A                                                                                                       | N/A                                                                                                          | Water Storage and Provision                                                  | The provision of water for human consumption and for other uses.                                                                             | N/A                                                                                              | N/A                                                                                                                                                                                   | Residential and Industrial Water Supply                                                               | The abstraction of water for residential and industrial purposes.  |
| 3                                                                  | Genetic Resources   | The genetic material from marine organisms that is extracted for non-medical, non-food purposes.                                                                                        | Genetic Resources                                                                                          | The provision/ extraction of genetic material from marine flora and fauna for use in non-marine, non-medical contexts, excluding the research value on Genetic Resources which is covered by “Information for Cognitive Development”. | Biotic Raw Materials (non-food): Genetic Resources                                                        | The provision/ extraction of genetic material from marine flora and fauna for use in non-medicinal contexts. | Biotic Materials and Biofuels                                                | The provision of biomass or biotic elements for non-food purposes.                                                                           | Raw Materials                                                                                    | The extraction of marine organisms for all purposes, except human consumption. (excluding dredge materials, oil or aggregates as these are not supported by living marine organisms.) | Raw Materials                                                                                         | The extraction of minerals and organisms not for human consumption |
| 4                                                                  | Medicinal Resources | The material that is extracted from or used in the marine environment for its ability to provide medicinal benefits.                                                                    | Medicinal Resources                                                                                        | Any material that is extracted from the coastal/ marine environment for its ability to pro-                                                                                                                                           | Biotic Raw Materials (non-food): Medicinal Resources                                                      | Any material that is extracted from or used in the marine environment for its ability to pro-                |                                                                              |                                                                                                                                              |                                                                                                  |                                                                                                                                                                                       |                                                                                                       |                                                                    |

|    |                               |                                                                                                             |                      |                                                                                                                                           |                                                             |                                                                                             |                    |                                                                                          |     |     |                          |                                                                                                   |
|----|-------------------------------|-------------------------------------------------------------------------------------------------------------|----------------------|-------------------------------------------------------------------------------------------------------------------------------------------|-------------------------------------------------------------|---------------------------------------------------------------------------------------------|--------------------|------------------------------------------------------------------------------------------|-----|-----|--------------------------|---------------------------------------------------------------------------------------------------|
|    |                               |                                                                                                             |                      | vide medicinal benefits, excluding the research value on Medicinal Resources which is covered by “Information for Cognitive Development”. |                                                             | vide medicinal benefits.                                                                    |                    |                                                                                          |     |     |                          |                                                                                                   |
| 5  | Raw Materials                 | The marine material that is extracted for human non-food uses, excluding those covered by Services 3 and 4. | Ornamental Resources | Any material extracted for use in decoration, fashion, handicrafts, souvenirs, etc.                                                       | Biotic Raw Materials (non-food): Ornamental Resources       | Any material that is extracted for use in decoration, fashion, handicrafts, souvenirs, etc. |                    |                                                                                          |     |     |                          |                                                                                                   |
|    |                               |                                                                                                             | Raw Materials        | The extraction of any material from coastal/marine environments, excluding which is covered by “Ornamental Resources”.                    | Biotic Raw Materials (non-food): Other Biotic Raw Materials | Extraction of all other renewable biotic resources.                                         |                    |                                                                                          |     |     |                          |                                                                                                   |
| 6  | Fossil Hydrocarbon Resources  | The fossil organic materials exploited from marine subsurface reservoirs.                                   | N/A                  | N/A                                                                                                                                       | N/A                                                         | N/A                                                                                         | N/A                | N/A                                                                                      | N/A | N/A | N/A                      | N/A                                                                                               |
| 7  | Renewable Energy              | The use of the marine environment for the generation of renewable energy.                                   | N/A                  | N/A                                                                                                                                       | N/A                                                         | N/A                                                                                         | N/A                | N/A                                                                                      | N/A | N/A | Energy                   | The non-consumptive use of the marine environment for energy generation e.g. wave and tidal power |
| 8  | Storage                       | The use of marine subsurface natural fractures and pores and artificial structures for storage purposes.    | N/A                  | N/A                                                                                                                                       | N/A                                                         | N/A                                                                                         | N/A                | N/A                                                                                      | N/A | N/A | N/A                      | N/A                                                                                               |
| 9  | Conditions for Infrastructure | The use of marine environments for the foundation and protection of infrastructure.                         | N/A                  | N/A                                                                                                                                       | N/A                                                         | N/A                                                                                         | N/A                | N/A                                                                                      | N/A | N/A | N/A                      | N/A                                                                                               |
| 10 | Transportation                | The use of waterways for commercial shipping.                                                               | N/A                  | N/A                                                                                                                                       | N/A                                                         | N/A                                                                                         | N/A                | N/A                                                                                      | N/A | N/A | Transport and Navigation | The use of waterways for shipping.                                                                |
| 11 | Weather Regulation            | The regulation of local weather conditions by marine ecosystems.                                            | N/A                  | N/A                                                                                                                                       | N/A                                                         | N/A                                                                                         | Weather Regulation | Influence of ecosystems and habitats on the local weather conditions such as thermoregu- | N/A | N/A | N/A                      | N/A                                                                                               |

|      |                    |                                                                                                                       |                                      |                                                                                                                                                                                                                                              |                                      |                                                                                                                                                                                                                                |                        |                                                                                                                                         |                                                     |                                                                                                                  |                            |                                                                          |
|------|--------------------|-----------------------------------------------------------------------------------------------------------------------|--------------------------------------|----------------------------------------------------------------------------------------------------------------------------------------------------------------------------------------------------------------------------------------------|--------------------------------------|--------------------------------------------------------------------------------------------------------------------------------------------------------------------------------------------------------------------------------|------------------------|-----------------------------------------------------------------------------------------------------------------------------------------|-----------------------------------------------------|------------------------------------------------------------------------------------------------------------------|----------------------------|--------------------------------------------------------------------------|
|      |                    |                                                                                                                       |                                      |                                                                                                                                                                                                                                              |                                      |                                                                                                                                                                                                                                |                        | lation and relative humidity.                                                                                                           |                                                     |                                                                                                                  |                            |                                                                          |
| 12   | Air Purification   | The regulation of the concentration of physical and chemical substances in the lower atmosphere by marine ecosystems. | Air Purification                     | Air Purification provided by a coastal/ marine ecosystem.                                                                                                                                                                                    | Air Purification                     | Influence of a marine ecosystem on concentration of pollutants from the atmosphere.                                                                                                                                            | Air Quality Regulation | Regulation of air pollutants concentration in the lower atmosphere.                                                                     | Gas and Climate Regulation                          | The balance and maintenance of the chemical composition of the atmosphere and oceans by marine living organisms. | Gas and Climate Regulation | Balance and maintenance of the atmosphere.                               |
| 13   | Climate Regulation | The regulation of the concentration of climate active gases by marine environments.                                   | Climate Regulation                   | The contribution of the biotic elements of a coastal/ marine ecosystem to the maintenance of a favourable climate via their impact on the hydrological cycle and their contribution to the climate-influencing substances in the atmosphere. | Climate Regulation                   | The contribution of a marine ecosystem to the maintenance of a favourable climate through impacts on the hydrological cycle, temperature regulation, and the contribution to climate-influencing substances in the atmosphere. | Climate Regulation     | Regulation of greenhouse and climate active gases. The most common proxies are the uptake, storage and sequestration of carbon dioxide. |                                                     |                                                                                                                  |                            |                                                                          |
| 14   | Water Purification | The removal of physical, chemical and, biological substances from seawater by marine ecosystems.                      | Waste Treatment                      | The removal by coastal/ marine ecosystems of pollutants added to coastal/ marine environments by humans through processes such as storage, burial, and biochemical recycling.                                                                | Waste Treatment and Assimilation     | The removal of contaminant and organic nutrient inputs to marine environments from humans.                                                                                                                                     | Water Purification     | Biochemical and physiochemical processes involved in the removal of wastes and pollutants from the aquatic environment.                 | Bioremediation of Waste                             | The removal of pollutants through storage, burial and recycling.                                                 | Bioremediation of Waste    | The removal of pollutants by storage, burial and recycling.              |
|      |                    |                                                                                                                       |                                      |                                                                                                                                                                                                                                              |                                      |                                                                                                                                                                                                                                |                        |                                                                                                                                         | Nutrient Cycling                                    | The storage, cycling and maintenance of nutrients by living marine organisms.                                    | Nutrient Cycling           | The storage, cycling and maintenance of nutrients by marine environment. |
| 15   | Nutrient Cycling   | The natural cycling processes leading to the availability of nutrients in sea water that produce organic matter.      | N/A                                  | N/A                                                                                                                                                                                                                                          | N/A                                  | N/A                                                                                                                                                                                                                            | Ocean Nourishment      | Natural cycling processes leading to the availability of nutrients in sea water for the production of organic matter.                   |                                                     |                                                                                                                  |                            |                                                                          |
| - 16 | Coastal Protection | The protection of humans and the built environment against extreme events, such as storm floods, and coastal erosion  | Disturbance Prevention or Moderation | The contribution of marine ecosystem structures to the dampening of the identity of environmental disturbances such as storm floods, tsunamis, and hurri-                                                                                    | Disturbance Prevention or Moderation | The contribution of marine ecosystem structures and functions to the dampening of the intensity of environmental disturbances such as storm floods, tsuna-                                                                     | Coastal Protection     | Protection against floods, droughts, hurricanes or other extreme events. Also, erosion prevention on the coast.                         | Disturbance Prevention (Flood and Storm Protection) | The dampening of environmental disturbances by biogenic structures.                                              | Disturbance Prevention     | Flood and storm protection by biogenic structures.                       |

|    |                              |                                                                                                                                                                         |                                  |                                                                                                                                                                                                                                                               |                                     |                                                                                                                                                                                                                                      |                            |                                                                                                                                                                                   |                                                |                                                                                                                                                                                                                                 |                              |                                                                                   |
|----|------------------------------|-------------------------------------------------------------------------------------------------------------------------------------------------------------------------|----------------------------------|---------------------------------------------------------------------------------------------------------------------------------------------------------------------------------------------------------------------------------------------------------------|-------------------------------------|--------------------------------------------------------------------------------------------------------------------------------------------------------------------------------------------------------------------------------------|----------------------------|-----------------------------------------------------------------------------------------------------------------------------------------------------------------------------------|------------------------------------------------|---------------------------------------------------------------------------------------------------------------------------------------------------------------------------------------------------------------------------------|------------------------------|-----------------------------------------------------------------------------------|
|    |                              |                                                                                                                                                                         |                                  | canes.                                                                                                                                                                                                                                                        |                                     | mis, and hurri-<br>canes.                                                                                                                                                                                                            |                            |                                                                                                                                                                                   |                                                |                                                                                                                                                                                                                                 |                              |                                                                                   |
|    |                              |                                                                                                                                                                         | Coastal<br>Erosion<br>Prevention | The contribution<br>of coastal/ ma-<br>rine ecosystems<br>to Coastal Ero-<br>sion Prevention,<br>excluding what<br>is covered by<br>“Regulation of<br>Water Flows”<br>(i.e. transporta-<br>tion or deposi-<br>tion of sedi-<br>ments by coastal<br>currents). | Coastal<br>Erosion<br>Prevention    | The contribution<br>of marine eco-<br>systems to<br>coastal erosion<br>prevention.                                                                                                                                                   |                            |                                                                                                                                                                                   | N/A                                            | N/A                                                                                                                                                                                                                             | N/A                          | N/A                                                                               |
| 17 | Regulation of<br>Water Flows | The contribution of<br>marine ecosystems<br>to the maintenance<br>of localised coastal<br>current structures.                                                           | Regulation<br>of Water<br>Flows  | The contribution<br>of marine and<br>coastal ecosys-<br>tems to the<br>maintenance of<br>localized coastal<br>current struc-<br>tures.                                                                                                                        | Regulation of<br>Water Flows        | The contribution<br>of marine eco-<br>systems to the<br>maintenance of<br>localized coastal<br>current struc-<br>tures.                                                                                                              | N/A                        | N/A                                                                                                                                                                               | N/A                                            | N/A                                                                                                                                                                                                                             | N/A                          | N/A                                                                               |
| 18 | Biological<br>Self-Control   | The contribution of<br>marine ecosystems<br>to the maintenance<br>of population dy-<br>namics, resilience<br>through food web<br>dynamics, disease<br>and pest control. | Biological<br>Control            | The contribution<br>of marine/<br>coastal ecosys-<br>tems to the<br>maintenance of<br>natural healthy<br>population<br>dynamics to<br>support ecosys-<br>tem resilience<br>through main-<br>taining food<br>web structure<br>and flows.                       | Biological Con-<br>trol             | The contribution<br>of marine eco-<br>systems to the<br>maintenance of<br>population<br>dynamics, resil-<br>ience through<br>food web dy-<br>namics, disease<br>and pest control.                                                    | Biological Regu-<br>lation | Biological con-<br>trol or pests<br>mostly linked to<br>the protection of<br>crops and ani-<br>mal production<br>that may affect<br>commercial<br>activities and<br>human health. | Resilience and<br>Resistance (Life<br>Support) | The extent to<br>which ecosys-<br>tems can absorb<br>recurrent natu-<br>ral and human<br>perturbations<br>and continue to<br>regenerate<br>without slowly<br>degrading or<br>unexpectedly<br>flipping to al-<br>ternate states. | Resilience and<br>Resistance | Life support by<br>the marine<br>environment<br>and its response<br>to pressures. |
| 19 | Lifecycle<br>Maintenance     | The marine habitat<br>that marine organ-<br>isms and communi-<br>ties provide for a<br>healthy and diverse<br>environment, in-<br>cluding viable gene<br>pools          | Lifecycle<br>Maintenance         | The contribution<br>of a particular<br>habitat to migra-<br>tory species’<br>populations<br>through the<br>provision of<br>essential habitat<br>for reproduction<br>and juvenile<br>maturation.                                                               | Migratory and<br>Nursery<br>Habitat | The contribution<br>of a particular<br>marine habitat<br>to migratory<br>and resident<br>species’ popula-<br>tions through<br>the provision of<br>critical habitat<br>for feeding, or<br>reproduction<br>and juvenile<br>maturation. | Life Cycle<br>Maintenance  | Biological and<br>physical sup-<br>port to facilitate<br>the healthy and<br>diverse repro-<br>duction of spe-<br>cies.                                                            | Biologically<br>Mediated<br>Habitat            | Habitat which is<br>provided by<br>living marine<br>organisms.                                                                                                                                                                  | Physical<br>Habitat          | The habitat<br>provided by the<br>physical (non-<br>living) envi-<br>ronment.     |
|    |                              |                                                                                                                                                                         | Gene Pool<br>Protection          | The contribution<br>of marine habi-<br>tats to the<br>maintenance of<br>viable gene<br>pools through                                                                                                                                                          | Gene Pool Pro-<br>tection           | The contribution<br>of marine habi-<br>tats to the<br>maintenance of<br>viable gene<br>pools through                                                                                                                                 |                            |                                                                                                                                                                                   | N/A                                            | N/A                                                                                                                                                                                                                             | N/A                          | N/A                                                                               |



|  |  |  |                                         |                                                                                                                                                                                                                                                                                                                                                                                                                                                                                                                 |                                         |                                                                                                                                                                                                                       |                   |                                                                                                                                                                                                                               |  |  |  |  |
|--|--|--|-----------------------------------------|-----------------------------------------------------------------------------------------------------------------------------------------------------------------------------------------------------------------------------------------------------------------------------------------------------------------------------------------------------------------------------------------------------------------------------------------------------------------------------------------------------------------|-----------------------------------------|-----------------------------------------------------------------------------------------------------------------------------------------------------------------------------------------------------------------------|-------------------|-------------------------------------------------------------------------------------------------------------------------------------------------------------------------------------------------------------------------------|--|--|--|--|
|  |  |  |                                         | that which is covered by “Aesthetic Information” and “Cultural Heritage and Identity”.                                                                                                                                                                                                                                                                                                                                                                                                                          |                                         | es. This excludes that covered by Aesthetic Experience” and “Inspiration for Culture, Art and Design”.                                                                                                                |                   |                                                                                                                                                                                                                               |  |  |  |  |
|  |  |  | Cultural Heritage and Identity          | The contribution that a coastal/ marine ecosystem makes to Cultural Heritage and Identity (excluding aesthetic and formal religious experiences). This includes the importance of marine/ coastal environments in cultural traditions and folklore. This covers the appreciation of a coastal community for local coastal/ marine environments and ecosystems (e.g. for a particular coast line or cliff formation) as well as the global importance that may be associated with a particular marine landscape. | Cultural Heritage                       | The contribution of marine ecosystems to the maintenance of cultural heritage and providing a 'sense of place'.                                                                                                       |                   |                                                                                                                                                                                                                               |  |  |  |  |
|  |  |  |                                         |                                                                                                                                                                                                                                                                                                                                                                                                                                                                                                                 | Cultural Diversity                      | The contribution of marine ecosystems to social and cultural values and adaptations that pertain to living at coasts and exploiting marine resources.                                                                 |                   |                                                                                                                                                                                                                               |  |  |  |  |
|  |  |  | Inspiration for Culture, Art and Design | The contribution that a coastal/ marine ecosystem makes to the existence of environmental features that inspire elements of culture, art, and/ or design. This excludes that which is covered by services “Ornamental Re-                                                                                                                                                                                                                                                                                       | Inspiration for Culture, Art and Design | The contribution that a marine ecosystem makes to the existence of environmental features that inspire elements of culture, art, and/ or design. This excludes that covered by “Ornamental Resources”, “Aesthetic In- | Cognitive Effects | Inspiration for arts and applications (e.g. architecture designs inspired by marine shells, medical applications replicating marine organic compounds). Material for research and education (e.g. discoveries of new deep sea |  |  |  |  |

|    |                       |                                                                                                           |                                       |                                                                                                                                                                                                                                                                            |                                       |                                                                                                                             |     |                                                                                                            |                                           |                                                                                                                                                                                                                                                    |                                        |                                                                   |
|----|-----------------------|-----------------------------------------------------------------------------------------------------------|---------------------------------------|----------------------------------------------------------------------------------------------------------------------------------------------------------------------------------------------------------------------------------------------------------------------------|---------------------------------------|-----------------------------------------------------------------------------------------------------------------------------|-----|------------------------------------------------------------------------------------------------------------|-------------------------------------------|----------------------------------------------------------------------------------------------------------------------------------------------------------------------------------------------------------------------------------------------------|----------------------------------------|-------------------------------------------------------------------|
|    |                       |                                                                                                           |                                       | sources”, “Recreation and Leisure”, “Aesthetic Information” and “Cultural Heritage and Identity”.                                                                                                                                                                          |                                       | formation” and “Cultural Diversity”.                                                                                        |     | species). Information and awareness (e.g. respect for nature through the observation of marine wild life). |                                           |                                                                                                                                                                                                                                                    |                                        |                                                                   |
| 22 | Cognitive Development | The generation of knowledge and technological development resulting from researching marine environments. | Information for Cognitive Development | The contribution that a coastal/marine ecosystem makes to education, research, etc. This includes the contribution that a coastal/marine ecosystem makes to bionic design and biomimetics and to research on applications of marine Genetic Resources and pharmaceuticals. | Information for Cognitive Development | The contribution that a marine ecosystem makes to education, research, and individual and collective cognitive development. |     |                                                                                                            | Cognitive Benefits                        | Cognitive development, including education and research, resulting from marine organisms.                                                                                                                                                          | Cognitive Values                       | The education and research resulting from the marine environment. |
| 23 | Sea Scape             | The emotional benefit attached to the marine environment with no physical use.                            | N/A                                   | N/A                                                                                                                                                                                                                                                                        | N/A                                   | N/A                                                                                                                         | N/A | N/A                                                                                                        | Feel Good or Warm Glow (non-use benefits) | The benefit which is derived from marine organisms without using them.<br>a)“bequest value”: future population can use ES<br>b)“existence value”: “sense of well-being, of simply knowing marine biodiversity exists” (and being interested in it) | Feel Good or Warm Glow                 | The value derived from the marine environment without using it.   |
| 24 | N/A                   | N/A                                                                                                       | N/A                                   | N/A                                                                                                                                                                                                                                                                        | N/A                                   | N/A                                                                                                                         | N/A | N/A                                                                                                        | Future Unknown and Speculative Benefits   | The currently unknown potential future uses of marine biodiversity.                                                                                                                                                                                | Future Unknown or Speculative Benefits | The currently unknown future uses of the marine environment.      |

1. Böhnke-Henrichs, A.; Baulcomb, C.; Koss, R.; Hussain, S.S.; de Groot, R.S. Typology and indicators of ecosystem services for marine spatial planning and management. *J. Environ. Manage.* **2013**, *130*, 135-145, 10.1016/j.jenvman.2013.08.027.
2. Hattam, C.; Atkins, J.P.; Beaumont, N.; Borger, T.; Bohnke-Henrichs, A.; Burdon, D.; de Groot, R.; Hoefnagel, E.; Nunes, P.; Piwowarczyk, J., *et al.* Marine ecosystem services: Linking indicators to their classification. *Ecol. Indic.* **2015**, *49*, 61-75, 10.1016/j.ecolind.2014.09.026.
3. Liqueste, C.; Piroddi, C.; Drakou, E.G.; Gurney, L.; Katsanevakis, S.; Charef, A.; Egoh, B. Current status and future prospects for the assessment of marine and coastal ecosystem services: A systematic review. *PLoS One* **2013**, *8*, 15, 10.1371/journal.pone.0067737.
4. Beaumont, N.J.; Austen, M.C.; Atkins, J.P.; Burdon, D.; Degraer, S.; Dentinho, T.P.; Derous, S.; Holm, P.; Horton, T.; van Ierland, E., *et al.* Identification, definition and quantification of goods and services provided by marine biodiversity: Implications for the ecosystem approach. *Mar. Pollut. Bull.* **2007**, *54*, 253-265, 10.1016/j.marpolbul.2006.12.003.
5. Atkins, J.P.; Burdon, D.; Elliott, M.; Gregory, A.J. Management of the marine environment: Integrating ecosystem services and societal benefits with the dpsir framework in a systems approach. *Mar. Pollut. Bull.* **2011**, *62*, 215-226, 10.1016/j.marpolbul.2010.12.012.
